# Supplementary material
Source: PubMed Central journal article supplement (PMC4291208)
Supplement: Supp_Table1.pdf [file Supp_Table1.pdf]

## Supplementary Data

SUPPLEMENTARY TABLE 1. DIFFERENCES IN BASELINE CHARACTERISTICS BETWEEN BLOOD ALCOHOL CONCENTRATION-TESTED AND NOT-TESTED PATIENTS

| <i>Variables</i>                         | <i>BAC tested</i><br>(n = 405) | <i>BAC not tested</i><br>(n = 480) | <i>p Value</i> |
|------------------------------------------|--------------------------------|------------------------------------|----------------|
| <b>Age</b>                               | 53 (41–62)                     | 62 (46–73)                         | <0.001         |
| <b>Injury mechanism</b>                  |                                |                                    |                |
| Ground level fall                        | 228 (56)                       | 228 (60)                           | <0.001         |
| Fall from height                         | 25 (6)                         | 29 (6)                             |                |
| Road traffic accident                    | 57 (14)                        | 89 (19)                            |                |
| Assault or suicide                       | 55 (14)                        | 25 (5)                             |                |
| Other/Unknown                            | 40 (10)                        | 49 (10)                            |                |
| <b>High-injury energy*</b>               | 70 (17)                        | 113 (24)                           | 0.022          |
| <b>Glasgow Coma Scale score</b>          |                                |                                    |                |
| 3–8                                      | 227 (56)                       | 161 (34)                           | <0.001         |
| 9–12                                     | 78 (19)                        | 128 (27)                           |                |
| 13–15                                    | 100 (25)                       | 191 (39)                           |                |
| <b>Motor score</b>                       |                                |                                    |                |
| Obeys/localizes                          | 217 (54)                       | 348 (73)                           | <0.001         |
| Normal/abnormal flexion                  | 70 (17)                        | 62 (13)                            |                |
| Extension/none                           | 118 (29)                       | 70 (14)                            |                |
| <b>Pupils</b>                            |                                |                                    |                |
| Both reacts                              | 289 (71)                       | 369 (77)                           | 0.108          |
| One reacts                               | 48 (12)                        | 53 (11)                            |                |
| None reacts                              | 68 (17)                        | 58 (12)                            |                |
| <b>Hypoxia</b>                           | 70 (17)                        | 66 (14)                            | 0.146          |
| <b>Hypotension</b>                       | 42 (10)                        | 28 (6)                             | 0.013          |
| <b>Traumatic SAH</b>                     | 248 (61)                       | 255 (53)                           | 0.015          |
| <b>Epidural hematoma</b>                 | 45 (11)                        | 45 (9)                             | 0.395          |
| <b>Acute mass lesion evacuation</b>      | 144 (36)                       | 160 (33)                           | 0.488          |
| <b>Marshall CT classification</b>        |                                |                                    |                |
| I                                        | 9 (2)                          | 8 (2)                              | 0.218          |
| II                                       | 93 (23)                        | 126 (26)                           |                |
| III–IV                                   | 54 (13)                        | 45 (9)                             |                |
| EML/NEML                                 | 249 (62)                       | 301 (63)                           |                |
| <b>Rotterdam CT score</b>                |                                |                                    |                |
| 1–2                                      | 79 (20)                        | 117 (24)                           | 0.016          |
| 3–4                                      | 207 (51)                       | 260 (54)                           |                |
| 5–6                                      | 119 (29)                       | 103 (22)                           |                |
| <b>Glucose (mmol/L)</b>                  | 6.9 (5.9–8.5)                  | 7.6 (6.3–9.3)                      | <0.001         |
| <b>Hemoglobin (g/L)</b>                  | 12.7 (11.2–14.1)               | 12.4 (11.1–13.6)                   | 0.042          |
| <b>INR</b>                               | 1.0 (1.0–1.1)                  | 1.1 (1.0–1.2)                      | <0.001         |
| <b>Platelet count (10<sup>9</sup>/L)</b> | 190 (138–236)                  | 187 (136–233)                      | 0.866          |
| <b>Predicted outcome</b>                 |                                |                                    |                |
| <b>IMPACTlab sum score</b>               | 8 (5–13)                       | 8 (6–11)                           | 0.487          |
| <b>APACHE II score</b>                   | 17 (13–22)                     | 18 (13–23)                         | 0.866          |
| <b>IMPACTlab-APACHE II risk</b>          |                                |                                    |                |
| Six-month mortality (%)                  | 9.1 (3.2–30.8)                 | 9.8 (3.5–24.9)                     | 0.892          |
| Six-month unfavorable outcome (%)        | 35.0 (18.7–61.6)               | 36.5 (20.3–57.4)                   | 0.979          |
| <b>Observed outcome</b>                  |                                |                                    |                |
| <b>Length of stay (days)</b>             |                                |                                    |                |
| ICU                                      | 3 (1–7)                        | 2 (1–5)                            | 0.001          |
| Hospital                                 | 9 (4–16)                       | 7 (4–13)                           | 0.003          |
| <b>Six-month outcome</b>                 |                                |                                    |                |
| Median GOS                               | 4 (1–5)                        | 4 (2–5)                            | 0.765          |
| Unfavorable outcome†                     | 186 (46)                       | 230 (48)                           | 0.554          |
| Mortality                                | 102 (25)                       | 117 (24)                           | 0.781          |

Continuous variables are presented as median (interquartile range), categorical presented as *n* (%).

\*High-energy injury is defined as fall from over 2 m height or speed >20 km/h.

†Defined as Glasgow Outcome Scale score of 1–3.

BAC, blood alcohol concentration; SAH, subarachnoid hemorrhage; CT, computed tomography; EML, evacuated mass lesions; NEML, non-evacuated mass lesions; INR, International Normalized Ratio; IMPACT, International Mission for Prognosis and Analysis of Clinical Trials in TBI (traumatic brain injury); APACHE II, Acute Physiology and Chronic Health Evaluation II; ICU, intensive care unit; GOS, Glasgow Outcome Scale.
